# Supplementary material
Source: PubMed Central journal article supplement (PMC3295189)
Supplement: supp_32.5.954_MCB6130-11_supp_mat.pdf [file supp_32.5.954_MCB6130-11_supp_mat.pdf]

## SUPPLEMENTARY INFORMATION

Supplementary information includes nine figures, two tables, supplementary methods and references.

## SUPPLEMENTARY FIGURES

**Figure S1. RNA binding proteins that modulate *Bcl-x* alternative splicing.** Diagram of *cis* and *trans*-acting elements localized in exon 2 that regulate *Bcl-x* splicing. Light grey boxes represent enhancers, while dark grey boxes represent silencers. The *pointed* and *flat arrows* indicate positive and negative regulation, respectively. SB1 is a 361 nt-long element located at the 5' of exon 2, possessing a repressive activity on the Bcl-xS splice site (Revil et al., 2007). CRCE1, bound by SAP155, and CRCE2 are two silencers located on both sides of the Bcl-xS splice site (Massiello et al., 2006; Massiello et al., 2004). RBM25 binds a B1AG enhancer of Bcl-xS (Zhou et al., 2008), whereas hnRNP K inhibits the production of Bcl-xS upon binding to the B1u element (Revil et al., 2009). hnRNP F and H stimulate Bcl-xS when bound to the B2G enhancer element (Garneau et al., 2005). SRp30c acts on two consecutive elements (AM2 and ML2) to encourage Bcl-xL expression (Cloutier et al., 2008). Although the *cis*-elements required for their activity are currently not known, SC35 and a hnRNP A1/Sam68 complex act as Bcl-xS positive regulators (Merdzhanova et al., 2008; Paronetto et al., 2007).

**Figure S2. The knockdown of eIF4A3, Acinus and SAP18 shift *Bcl-x* splicing towards an increased production of Bcl-x<sub>S</sub>.** RT-PCR analysis of *Bcl-x* alternative splicing following the knockdown of EJC components. 293 and HeLa cells were transfected with siRNAs targeting

eIF4A3, Acinus, SAP18 and MLN51. Total RNA was extracted 72 hours later. RT-PCR analysis of <sup>32</sup>P-labeled products was carried out, a portion of which is shown here. The products were quantitated and the values were plotted in Figure 1C.

**Figure S3. The knockdown of eIF4A3, Y14 and RNPS1 do not significantly alter the expression levels of known *Bcl-x* splicing regulators.** Following transfection of 293 and HeLa cells, cell lysates were prepared 48 or 72 hours later, and analyzed by Western blots to monitor the levels of the known *Bcl-x* splicing regulators hnRNP K, hnRNP F/H, hnRNP A1 and SRp30c (left panels).  $\beta$ -actin was used as a loading control. The same cell samples were used for RNA extraction and RT-PCR analysis of *Bcl-x* alternative splicing (bar graphs on the right).

**Figure S4. The shifts in *Bcl-x* splicing induced by knocking down Y14 and RNPS1 require active transcription.** RT-PCR analysis of *Bcl-x* alternative splicing in 293 and HeLa cells transfected with siRNAs targeting Y14 and RNPS1. After 24 hours, cells were treated with actinomycin D or DRB. Twenty-four hours later, total RNA was extracted and RT-PCR was performed to amplify both *Bcl-x* splice forms.

**Figure S5. RNPS1 modulates *Bcl-x* pre-mRNA splicing in a SB1-dependent manner, while core EJC factors and PYM activities are independent of SB1.** Gels displaying a RT-PCR analysis conducted on transcripts derived from *Bcl-x* minigenes following the knockdown/overexpression of EJC components. 293 cells were treated with siRNAs targeting RNPS1, Y14, eIF4A3 or PYM and transfected with *Bcl-x* minigenes, or co-transfected with FLAG-RNPS1, FLAG-Y14 or FLAG-PYM constructs with the minigenes. The values extracted from these experiments are part of Figures 2B and 2C.

**Figure S6. EJC components associate with the *Bcl-x* pre-mRNA and modulate its alternative splicing.** (A) Gels displaying RT-PCR analyses of *Bcl-x* alternative splicing *in vitro*, following incubation of various *Bcl-x* mutant transcripts in a HeLa nuclear extract supplemented with increasing amount of His-tagged recombinant eIF4A3 or Magoh-Y14 $\Delta$ N. These results were part of the graphs presented in Figure 3E. (B) Following the incubation of the various *Bcl-x* mutant pre-mRNAs in a HeLa nuclear extract, radiolabeled RNA was immunoprecipitated with anti-Y14. The percentage of immunoprecipitated labeled RNA (relative to input and subtracted from a mock immunoprecipitation performed with each pre-mRNA) is plotted. (C) Following the incubation of X2 (+SB1) and X2.13 (-SB1) *Bcl-x* mutant transcripts in a HeLa nuclear extract, radiolabeled RNA was immunoprecipitated with anti-RNPS1 (Abcam ab56806). The percentage of immunoprecipitated labeled RNA (relative to input and subtracted from a mock immunoprecipitation performed with each pre-mRNA) is plotted.

**Figure S7. Isoform changes detected on the Bcl-x, Mcl1 and Bim proteins.**

Protein samples from 293 and HeLa cells treated with various siRNAs were analyzed by western blotting for corresponding shifts in protein isoforms. Anti-GAPDH was used as a loading control. A slight increase in Bcl-xS is observed upon knockdown of Y14 and RNPS1. In the case of Mcl1, although the pro-apoptotic Mcl1-S variant could not be detected, we noted a reduction in the level of the larger anti-apoptotic product Mcl1-L when eIF4A3 was inhibited. Likewise, the longest and least pro-apoptotic BimEL isoform is reduced upon knockdown of RNPS1.

**Figure S8. The knockdown of Y14, RNPS1 and eIF4A3 induce PARP cleavage and the shifts in *Bcl-x* splicing induced by the depletion of Y14 and RNPS1 are independent of caspases.**

293 and HeLa cells were transfected with siRNAs targeting Y14 and RNPS1 for 24 hours or were pre-treated for 24 hours with vinorelbine, a known caspases activator. Cells were then treated or not with the general caspases inhibitor z-VAD-fmk. After 24 hours, total proteins and RNA were extracted. (A) Western blot analysis of PARP cleavage indicating that all treatment stimulated caspases-dependent PARP cleavage. (B) 293 and HeLa cells were transfected with a siRNA targeting eIF4A3 and PARP cleavage was assessed by Western blot analysis. (C) RT-PCR analysis of *Bcl-x* alternative splicing in 293 and HeLa cells indicating that caspases inhibition does not alter the *Bcl-x* splicing shift induced by siY14 and siRNPS1.

**Figure S9. The knockdowns of Y14, eIF4A3 and RNPS1 significantly induce apoptosis in PC-3 cells.** Annexin-V assay in PC-3 cells transfected with siRNAs targeting EJC components. Cells were immunostained for annexin-V (red) and nuclei were labelled with Hoechst (blue) (Sudo et al., 2010). The percentage of apoptotic cells was quantitated (bottom graph) and compared to various controls (lipofectamine alone, control siRNA and a variety of siRNAs (2 siRNAs each) targeting Y14, eIF4A3 and the RNA binding proteins CDC5L, EWSR1 and KHSRP that display splicing regulatory activity (Dutertre et al., 2010; Lleres et al., 2010; Min et al., 1997), but do not affect *Bcl-x* alternative splicing (Table S1).

## SUPPLEMENTARY TABLES

**Table S1.** Impact of depleting various RNA binding proteins on the *Bcl-x* splicing ratio. Cells were transfected for 96 hours with siRNAs. The Bcl-xL and Bcl-xS mRNA isoforms were co-amplified by RT-PCR in the presence of <sup>32</sup>P-dCTP. Products were fractionated by electrophoresis and quantitated by autoradiography. A change in the percentage of the Bcl-xS product was considered

significant (and indicated with an X) only if it was superior to 10% and detected with both siRNAs. The knockdown efficiency was assessed by qRT-PCR and a gray background indicates a decrease in mRNA expression superior to 50%.

**Table S2.** Sequence of siRNAs used for the knockdown of RNA binding proteins. The list contains all siRNAs used in the original screen as well as siRNAs against several EJC components used thereafter.

## SUPPLEMENTARY METHODS

**Cell culture and transfections.** HeLa and 293 cells were grown and transfected in standard conditions, as described in the “Material and Methods” section of the current paper.

**Antibodies.** Antibodies used for this complementary analysis were the following:  $\alpha$ -Bcl-x (Genetex #105661),  $\alpha$ -Bim (Cell Signaling #2819),  $\alpha$ -Mcl1 (Santa Cruz Biotechnology #MCL1S-19),  $\alpha$ -actin (Sigma #A2066),  $\alpha$ -GAPDH (Novus Biologicals #NB300-221). Rabbit polyclonal serum was raised against a peptide unique to the hnRNP A1 protein (ASASSSQRGR,  $\alpha$ -hnRNP A1). Peptide synthesis and antibody production was carried out initially by the Service de Séquence de Peptide de l’Est du Québec, (CHUL, Ste-Foy, Quebec, Canada). For  $\alpha$ -hnRNP F,  $\alpha$ -hnRNP H and  $\alpha$ -SRp30c antibodies, rabbit polyclonal sera were raised against a peptide unique to the hnRNP F protein (MMLGPEGGEGFVVKC), hnRNP H protein (QVLQENS SDFQSN IAC) and SRp30c protein (MSGWADERGGEGDGR). Peptide synthesis and antibody production was carried out initially by Chemicon International (Temecula, CA, USA).  $\alpha$ -hnRNP K was a gift from G. Dreyfuss.

**Chemicals and inhibitors.** Actinomycin D and DRB were purchased from Calbiochem.

**PARP cleavage assay.** The inhibitor of caspases z-VAD-fmk (Calbiochem) was used at a final concentration of 50  $\mu$ M and cells were treated for 24 hours after vinorelbine or the siRNA treatments was initiated. Two-third of the cells from each well were then collected for protein extraction and the rest was used for RNA extraction. Whole cells extracts were prepared in Laemmli sample buffer. Protein samples (20  $\mu$ g/well) were fractionated on a 9% SDS-PAGE (29:1 acrylamide:bisacrylamide) and transferred onto a Hybond-C nitrocellulose membrane. Immunodetection was performed according to standard protocols using a dilution of 1:500 of the rabbit anti-PARP antibody (Biosource) and 1:5000 of the HRP-conjugated anti-rabbit secondary antibody (Amersham Biosciences).

## SUPPLEMENTARY REFERENCES

- Cloutier, P., Toutant, J., Shkreta, L., Goekjian, S., Revil, T., and Chabot, B. (2008). Antagonistic effects of the SRp30c protein and cryptic 5' splice sites on the alternative splicing of the apoptotic regulator Bcl-x. *J Biol Chem* 283, 21315-21324.
- Dutertre, M., Sanchez, G., De Cian, M.C., Barbier, J., Dardenne, E., Gratadou, L., Dujardin, G., Le Jossic-Corcos, C., Corcos, L., and Auboeuf, D. (2010). Cotranscriptional exon skipping in the genotoxic stress response. *Nat Struct Mol Biol* 17, 1358-1366.
- Garneau, D., Revil, T., Fisette, J.F., and Chabot, B. (2005). Heterogeneous nuclear ribonucleoprotein F/H proteins modulate the alternative splicing of the apoptotic mediator Bcl-x. *J Biol Chem* 280, 22641-22650.
- Lleres, D., Denegri, M., Biggiogera, M., Ajuh, P., and Lamond, A.I. (2010). Direct interaction between hnRNP-M and CDC5L/PLRG1 proteins affects alternative splice site choice. *EMBO Rep* 11, 445-451.
- Massiello, A., Roesser, J.R., and Chalfant, C.E. (2006). SAP155 Binds to ceramide-responsive RNA cis-element 1 and regulates the alternative 5' splice site selection of Bcl-x pre-mRNA. *Faseb J* 20, 1680-1682.
- Massiello, A., Salas, A., Pinkerman, R.L., Roddy, P., Roesser, J.R., and Chalfant, C.E. (2004). Identification of two RNA cis-elements that function to regulate the 5' splice site selection of Bcl-x pre-mRNA in response to ceramide. *J Biol Chem* 279, 15799-15804.
- Merdzhanova, G., Edmond, V., De Seranno, S., Van den Broeck, A., Corcos, L., Brambilla, C., Brambilla, E., Gazzeri, S., and Eymin, B. (2008). E2F1 controls alternative splicing pattern of genes involved in apoptosis through upregulation of the splicing factor SC35. *Cell Death Differ* 15, 1815-1823.

- Min, H., Turck, C.W., Nikolic, J.M., and Black, D.L. (1997). A new regulatory protein, KSRP, mediates exon inclusion through an intronic splicing enhancer. *Genes Dev* 11, 1023-1036.
- Paronetto, M.P., Achsel, T., Massiello, A., Chalfant, C.E., and Sette, C. (2007). The RNA-binding protein Sam68 modulates the alternative splicing of Bcl-x. *J Cell Biol* 176, 929-939.
- Revil, T., Pelletier, J., Toutant, J., Cloutier, A., and Chabot, B. (2009). Heterogeneous nuclear ribonucleoprotein K represses the production of pro-apoptotic Bcl-xS splice isoform. *J Biol Chem* 284, 21458-21467.
- Revil, T., Toutant, J., Shkreta, L., Garneau, D., Cloutier, P., and Chabot, B. (2007). Protein kinase C-dependent control of Bcl-x alternative splicing. *Mol Cell Biol* 27, 8431-8441.
- Sudo, H., Tsuji, A.B., Sugyo, A., Kohda, M., Sogawa, C., Yoshida, C., Harada, Y.N., Hino, O., and Saga, T. (2010). Knockdown of COPA, identified by loss-of-function screen, induces apoptosis and suppresses tumor growth in mesothelioma mouse model. *Genomics* 95, 210-216.
- Zhou, A., Ou, A.C., Cho, A., Benz, E.J., Jr., and Huang, S.C. (2008). Novel splicing factor RBM25 modulates Bcl-x pre-mRNA 5' splice site selection. *Mol Cell Biol* 28, 5924-5936.

# Supplementary figures

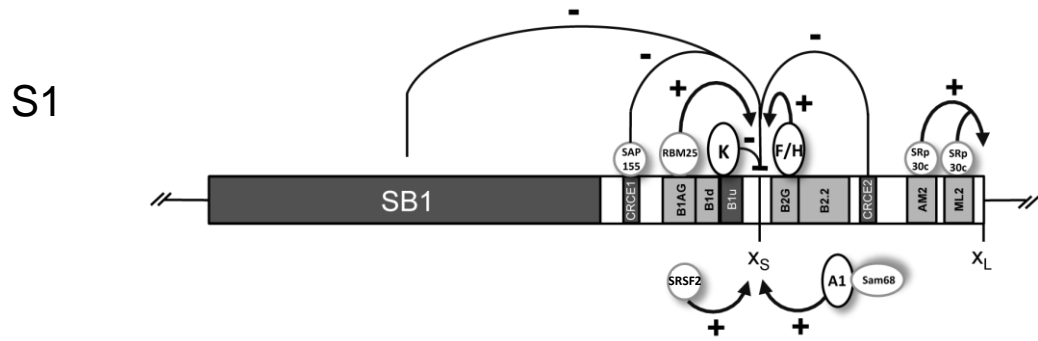

S2

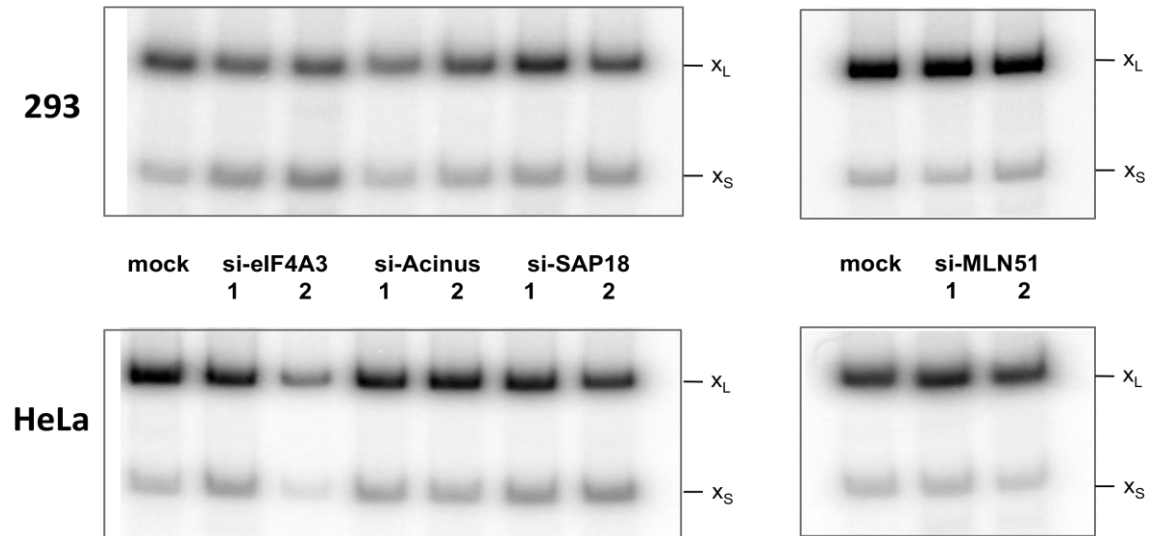



# Supplementary figures

S3

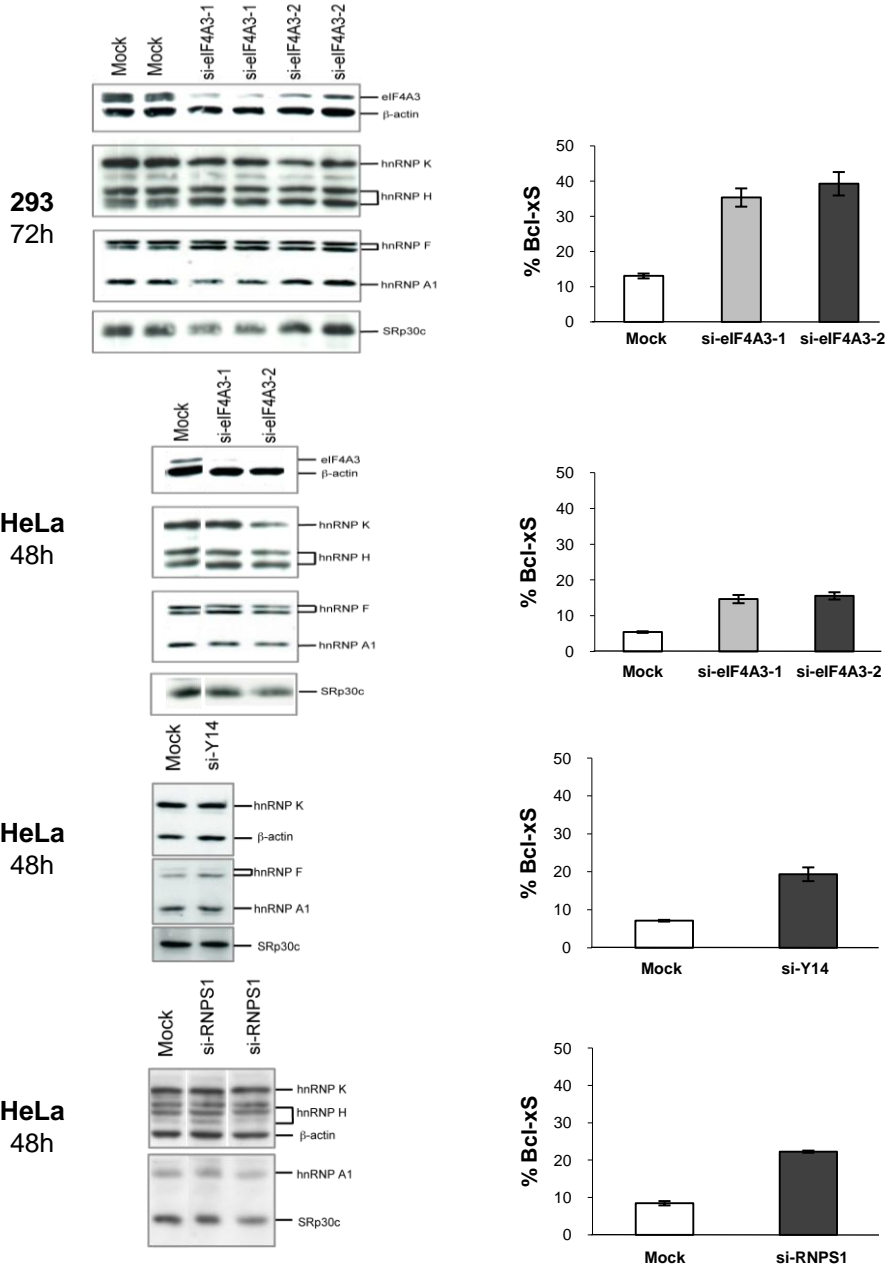

# Supplementary figures

S4

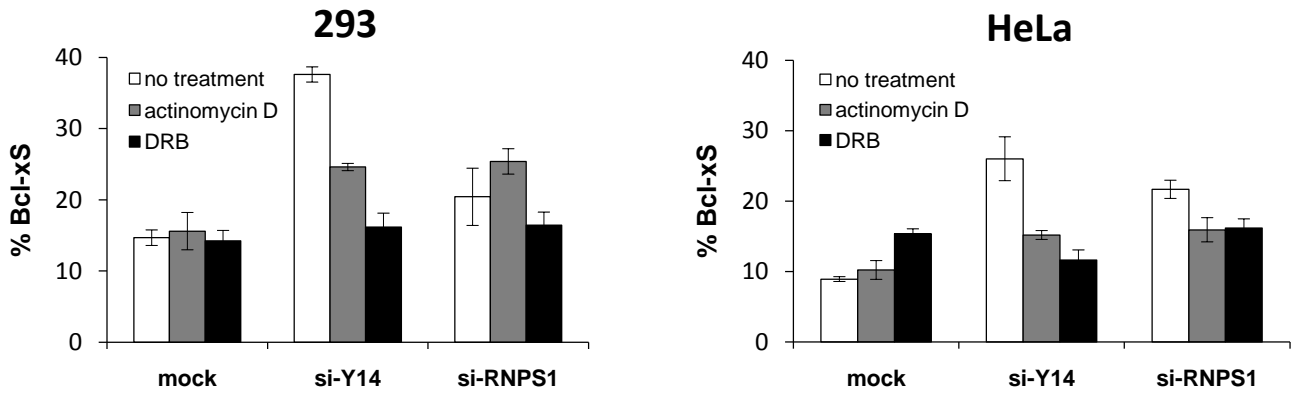

S5

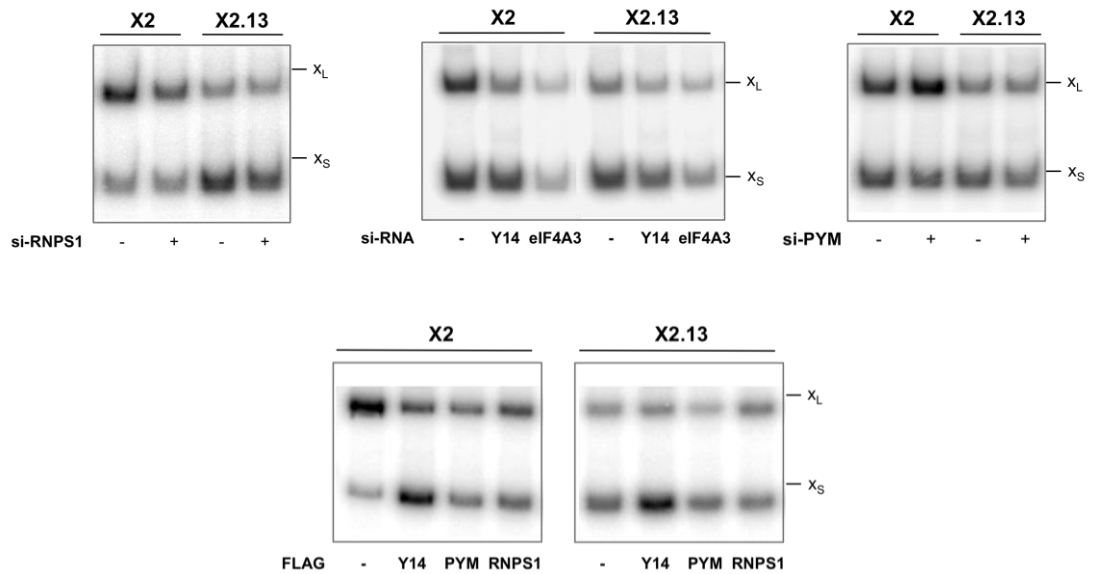

# Supplementary figures

## S6A

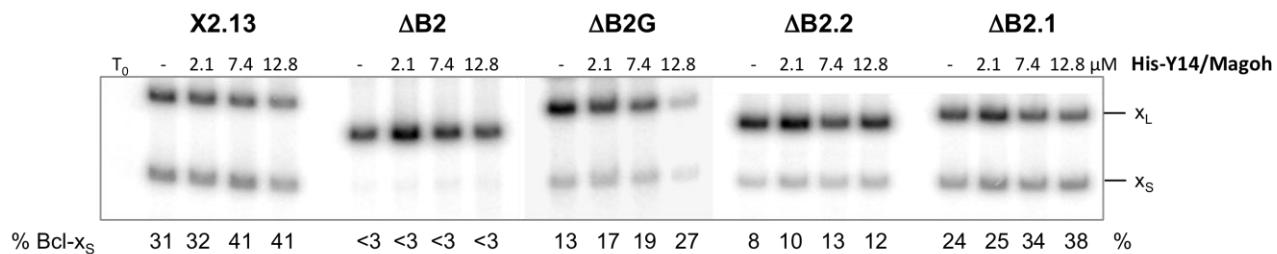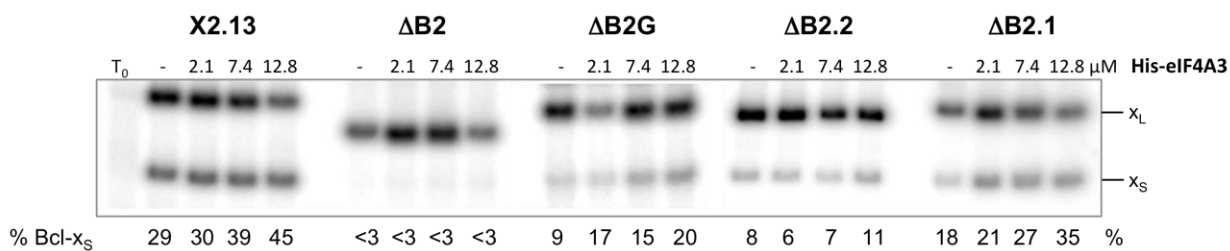

## S6B

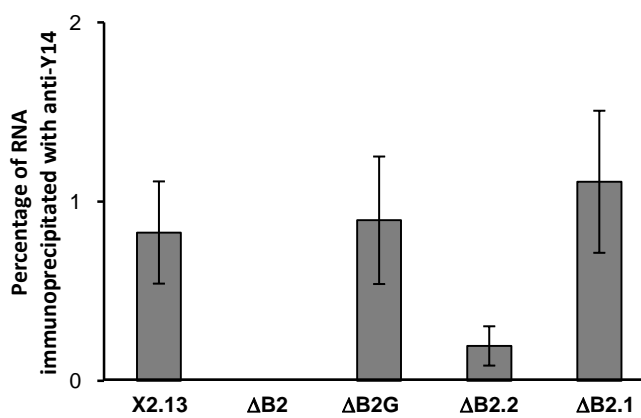

## S6C

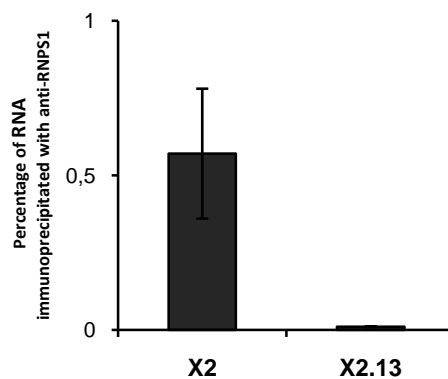

# Supplementary figures

S7

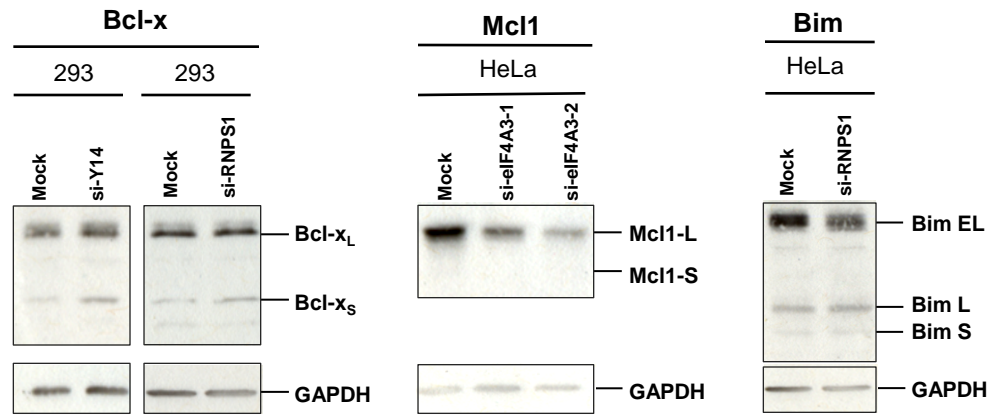

# Supplementary figures

S8A

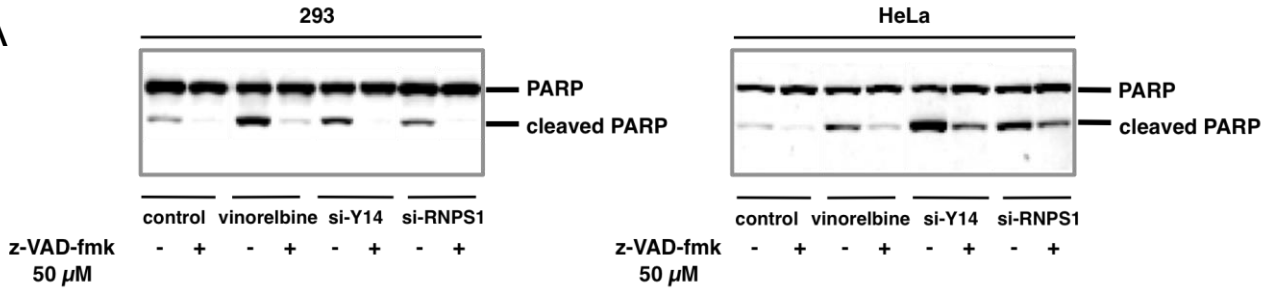

S8B

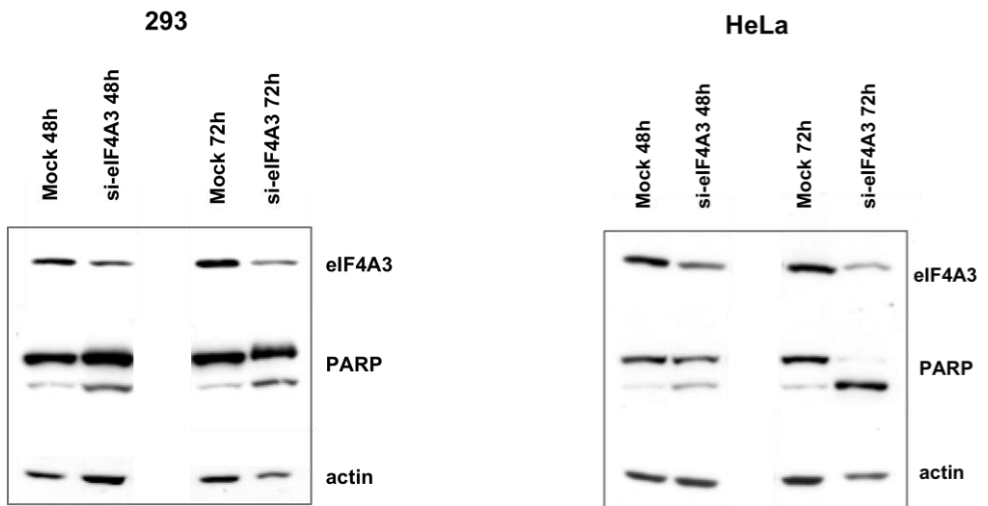

S8C

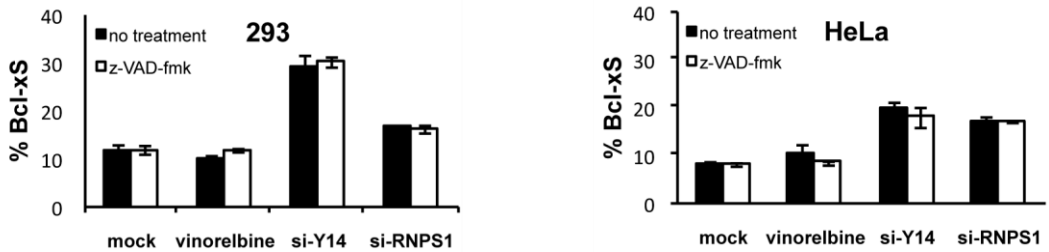

# Supplementary figures

S9

PC-3

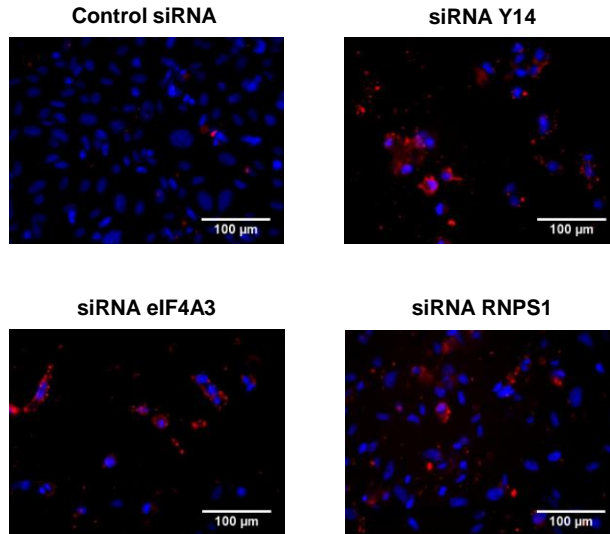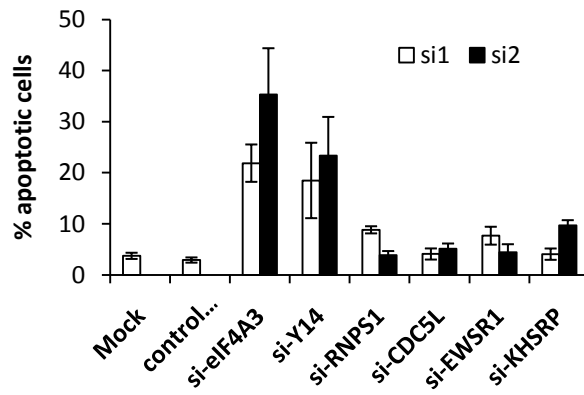

Supplementary Table 1

|          | PC3 | MDA-MB-231 |
|----------|-----|------------|
| hnRNP F  |     |            |
| hnRNP H  |     |            |
| hnRNP K  | x   | x          |
| hnRNP A1 |     |            |
| hnRNP A2 |     |            |
| hnRNP L  |     |            |
| U2AF1    |     |            |
| U2AF2    |     |            |
| PRPF4B   |     |            |
| PRPF8    |     |            |
| SF3B4    |     |            |
| SF3A1    |     |            |
| SF3A2    |     |            |
| Y14      | x   | x          |
| RBM25    |     |            |
| RBM10    |     |            |
| RBM5     |     |            |
| RBM6     |     |            |
| RBM9     |     |            |
| RBMS1    |     |            |
| BPMS     |     |            |
| RNPS1    | x   | x          |
| MLN51    |     |            |
| DDX6     |     |            |
| DDX39    |     |            |
| eIF4A2   |     |            |
| FUS      |     |            |
| KHSRP    |     |            |
| Sam68    |     |            |
| SFPQ     |     |            |
| Raly     |     |            |
| SRPK1    |     |            |
| SFRS16   |     |            |
| SFRS14   |     |            |
| SFRS10   |     |            |
| RNPC2    |     |            |
| BRCA1    |     |            |
| HMGA1    |     |            |
| THOC1    |     |            |
| EWSR1    |     |            |
| TAF15    |     |            |
| FXR1     |     |            |
| ZNF638   |     |            |
| CTNNB1   |     |            |
| Nono     |     |            |
| FIP1L    |     |            |
| TIAL1    |     |            |
| RPL22    |     |            |
| CDK11    |     |            |
| MBNL1    |     |            |
| FMR1     |     |            |
| SNRP70   |     |            |
| NOVA     |     |            |
| CDC5L    |     |            |
| CUGBP1   |     |            |
| DEK      |     |            |
| CRK7     |     |            |
| CCNH     |     |            |
| NPM1     |     |            |
| SAFB     |     |            |
| SRA1     |     |            |

Supplementary Table 2

| Gene    | Sequence siRNA 1         | Sequence siRNA 2        |
|---------|--------------------------|-------------------------|
| ACINUS  | UCCCAUCAGUAUCACCACUTT    | GCUCGCUGCCCAAUUCAUUUTT  |
| ALY/REF | GGCAGCACGAUCUUUUCGATT    | GCACGAUCUUUUCGACAGUTT   |
| BRCA1   | CAGCUUGACACAGGUUUGGTT    | ACCCGAAAUCCUCCUUGTT     |
| CCNH    | GGUACGGCUUGUAUGUAUUTT    | UACGGCUUGUAUGUAUUUUCTT  |
| CDC5L   | GCACAUUACCUAUCUGGAATT    | GUUUGGUACCAUAAUUCATT    |
| CDK11   | CACCGUGCAUCAAAGCAATT     | CUUACUUUACCAGAUUCUUTT   |
| CRK7    | CACCGAAGUGUUGUUAACATT    | CCAUCUGUGAAAUCAAAUUTT   |
| CTNNB1  | GUUAUCAGAGGACUAAAUATT    | GUACCGGAGCCCUUCACAUTT   |
| CUGBP1  | CAGAUUUUGAUGCUAUCATT     | CUUJCGGGAACUCUUCGAATT   |
| DDX39   | CGAUCUUUUGGAUUACGAUTT    | GGCUCCUCAAGAGAGCACATT   |
| DDX6    | CUCUACUGACUUUCAAAGTT     | ACGUGAGUGAAUUCAGAUATT   |
| DEK     | AAAGGAAGUGUCCAAUUAUATT   | GAUUGUGGGUCAGUUCAGUTT   |
| EIF4A2  | GGCUGAAGCACCAUUAUUTT     | GGCACUUGGAGACUUAUUGTT   |
| EIF4A3  | AGCCACCUUCAGUAUCUCATT    | GCUCUCGGUGACUACAUUGTT   |
| EWSR1   | CCACUGAUGUCAGCUUAUACTT   | AAGCUAUGGAACCUAUGGATT   |
| FIP1L   | GCGUCACAGAGCAAGUCGATT    | GACGACACAGGGAGAAAGATT   |
| FMR1    | CACUGCUAUUGAUCUAGAUUTT   | CCUCGAGAUUUCAUGAACATT   |
| FUS     | GGACAGCCCAUGAUUAAUUTT    | GGCAACGGUCUCUUUUGATT    |
| FXR1    | GUACGAAGUUGAUGCUUATT     | UUGCGAAGUAUUCGUACGATT   |
| HMG1    | CCACAACUCCAGGAAGGAATT    | CACAACUCCAGGAAGGAATT    |
| HNRNPA1 | CCACUUAACUGUGAAAAAGAUUTT | AACUUUGGUGGUGGUCGUCATT  |
| HNRNPA2 | AAGCUUUGAAACCACAGAAGATT  | AAGAAGCUGUUUGUUGGCGGATT |
| HNRNPF  | GCGACCGAGAACCACAUUUTT    | GGAAGAAAUUGUUCAGUUCTT   |
| HNRNPH  | GCACAGGUUAUUGAAAUCTT     | GGAAGAAAUUGUUCAGUUCTT   |
| HNRNPK  | GAGCGCAUUAUGAUAUCATT     | UCUAGCAGGAGGAUUUAUUTT   |
| HNRNPL  | GCACUCUGAAGAUCCAAUATT    | UAUGGCUUGGAUCAUUCUATT   |
| KHSRP   | GCACCGUGCAGGAGAUCAUTT    | GCGGGGAGACCAUUAAGCATT   |
| MBNL1   | GACGCAUUAACUUGAUUUCATT   | AAACGCAGUUGGAGAUAAATT   |
| MLN51   | CUCGGAUUUAUGAAAGUGCATT   | CCAGCAUACAUACCUCGGATT   |
| NONO    | GACUUAUUGACCUGAAGAAUUTT  | CCUGCAAAUUGGGCAACAGGTT  |
| NOVA    | AGGUUCUCAUACCUAGUUATT    | GCUGCUGGAUCUUAUUUUGTT   |
| NPM1    | AAUGAGCACCAGUUAUCUUTT    | CACUUUAAGGUGGAUUAUUGTT  |
| PRPF4B  | CCUUAUGUCAGCAGUUGUUTT    | CUUACGAGAGGUGUUAAAATT   |
| PRPF8   | GAGAUAGGAGGCAUUAUATT     | CGCCGAGAAAAAGAGAUATT    |
| RALY    | GCAAGCAAUGUAACCAACATT    | CUCUCGAGUCUUAUUGGATT    |
| RBM10   | AAGGUGUCGAUGCACUACATT    | GCAUUGUAACGCCUUAUCGATT  |
| RBM25   | AGGAGAGAUCAUGAUUATT      | CUGUCACUAAUGACGAUGATT   |
| RBM5    | GAUACGGUUCUACAUAGATT     | UAGUACGGCUAUUUGCUGCUTT  |
| RBM6    | UCGACCUGCUAACAGAACUTT    | ACCGAUCUUCUGUUCAUUUTT   |
| RBM9    | CACCUCGCGAGAAUGGAAUUTT   | CAGACACAAGUAGUUGAAATT   |
| RBM51   | CUGAUGGAGGACAGAAAAATT    | GAAGACCAUGGCAUAGGATT    |
| RBPMS   | CUACGACUAGAGUUUGCUATT    | CCGCUUCGAUCCUGAAAUUTT   |
| RNPC2   | GCGGCAAGAAUUCGACCAATT    | GAUGCAAGGACAGUCUUCUTT   |
| RNPS1   | UCUCGGUCCAGCUCGACUUTT    | GCAUCCAGCCGUCAGGAATT    |
| RPL22   | UGGUGAAGGGGGGCAAAAATT    | GCAAGUUCUGAUGUUCACUTT   |
| SAFB    | CCGAACGGACUGUAGUUAUUTT   | AGGGGUGCCUUGUAUUGATT    |
| SAM68   | CGAGUGCUGAUACCUGUCATT    | UGAUGGAUGAUUUCUGUCATT   |
| SAP18   | CGGGUCUUCACCACCAUATT     | GGCGCAUGAGACCAUUAUATT   |
| SF3A1   | CUGACAUUCUGGGUAGATT      | CUGAGCGGCGUACUGACUUTT   |
| SF3A2   | GACCCGUACUUAUGAAGATT     | AUGCAAACUCUGCCUGACATT   |
| SF3B4   | GUAGCUCCUUGGGGCAAAGTT    | GGCAAAGGUACUAAUCCUTT    |
| SFPQ    | ACAGCCGAAUGGGCUACAUTT    | UUCGUCAACGUGAGAUGGATT   |
| SFRS10  | UCACGUAGCAGGUCUUCATT     | GUCUUACAGUCGAGAUUAUUTT  |
| SFRS14  | UUCGAUGUGUUCGACAGATT     | GAAAUACUUAAGAGAAUUGTT   |
| SFRS16  | GUACCAGAUCAUUAUGATT      | UGUACCAGAUCAUUAUGATT    |
| SNRP70  | CACCACAAUCAACCUUAUUTT    | GGUGUACGGACCUUAUCAAAATT |
| SRA1    | CCACAGUCGAACUCCUCUATT    | CCACGUCUGACAAGAGAGATT   |
| SRPK1   | AGGUUAUCAUCUUGUGAAATT    | ACCAUGUGAUCCGAAAGUUTT   |
| TAF15   | GGAUUAUGGACCCAGAACATT    | GUGUCUACAGAUCAAGUUGTT   |
| TAP     | GGUCCUGAGCAUGAUUCATT     | AGCAGCUUAGCCGAGAUUUTT   |
| THOC1   | GUCGACACAUCUGUUGCATT     | GGCAGGUCAAAUCUAAAAGTT   |
| TIAL1   | GAUAUGGUUAGGCAAGUUAATT   | GUAACCAGUAAGUCCAATT     |
| U2AF1   | GCUCUCGGUUGCACAUAUATT    | GAAUAACCGUUGGUUUUAUUTT  |
| U2AF2   | GCUCAACGAGAAUAAACAATT    | AGGUCCUGUGCCUCAUGAATT   |
| UAP56   | AAGGGCUUGGCUAUCACAUUU    | GUCACACUCGGGAGUUGGCTT   |
| Y14     | CCACCGAAGAAGACAUACATT    | GGAUGCGUGAGGAUUAUGATT   |
| ZNF638  | AGCAUUAAGAAGAUAGUATT     | CGCUACAAGAGAGUUAUUCATT  |
